# Supplementary material for: miR-196b-5p and miR-107 Expression Differentiates Ocular Sebaceous Carcinoma from Squamous Cell Carcinoma of the Conjunctiva
Source: MDPI journal article supplement (doi:10.3390/ijms23094877), 2022-04-28
Supplement: s1 [file s1]

## Supplemental Information

### miR-196-5p and miR-107 expression differentiates ocular sebaceous carcinoma from squamous cell carcinoma of the conjunctiva

Ronald O.B. de Keizer, Anne L.M. Vriends, Gijsbert J. Hötte, Dion A. Paridaens, Erik A.C. Wiemer and Robert M. Verdijk

**Table S1. Differentially expressed microRNAs between squamous cell carcinoma of the conjunctiva (SCCC) and corresponding healthy control tissue.** Listed are 79 miRNAs ( $p < 0.05$ ) that are differentially expressed between SCCC ( $n=18$ ) and control tissue (conjunctival squamous epithelium of the eyelid) ( $n=6$ ) and that were used in the supervised hierarchical clustering (Figure 1A). p-values of Mann Whitney U test and false discovery rate p-values (FDR) are listed as well as the average expression level ratios of control/SCCC and SCCC/control.

| miRNA           | Control/SCCC | SCCC/Control | P-value | FDR      |
|-----------------|--------------|--------------|---------|----------|
| hsa-miR-148a    | 3.363924     | 0.297272     | 0.0001  | 0.001428 |
| hsa-miR-18b     | 0.014008     | 71.38607     | 0.0001  | 0.001428 |
| hsa-miR-200c    | 2.327974     | 0.429558     | 0.0001  | 0.002044 |
| hsa-miR-375     | 7.901268     | 0.126562     | 0.0001  | 0.002044 |
| hsa-miR-100     | 2.61338      | 0.382646     | 0.0001  | 0.003746 |
| hsa-miR-139-5p  | 5.778269     | 0.173062     | 0.0001  | 0.003746 |
| hsa-miR-509-5p  | 166.6427     | 0.006001     | 0.0001  | 0.004612 |
| hsa-miR-628-5p  | 2.976465     | 0.335969     | 0.0001  | 0.004612 |
| hsa-miR-328     | 4.363051     | 0.229197     | 0.0001  | 0.007177 |
| hsa-miR-26b     | 2.492053     | 0.401276     | 0.0001  | 0.008889 |
| hsa-miR-182     | 2.729625     | 0.366351     | 0.0001  | 0.010049 |
| hsa-miR-195     | 2.550753     | 0.392041     | 0.0001  | 0.011027 |
| hsa-miR-146a    | 4.466717     | 0.223878     | 0.0001  | 0.015449 |
| hsa-miR-508     | 29.70985     | 0.033659     | 0.0001  | 0.01888  |
| hsa-miR-424     | 0.029198     | 34.24947     | 0.001   | 0.007177 |
| hsa-miR-574-3p  | 2.576914     | 0.388061     | 0.001   | 0.008889 |
| hsa-miR-200b    | 2.302402     | 0.434329     | 0.001   | 0.008889 |
| hsa-miR-18a     | 0.366928     | 2.725333     | 0.001   | 0.008889 |
| hsa-miR-191     | 2.515353     | 0.397559     | 0.001   | 0.008965 |
| hsa-miR-99a     | 2.095678     | 0.477173     | 0.001   | 0.01308  |
| hsa-miR-218     | 2.675681     | 0.373737     | 0.001   | 0.016045 |
| hsa-miR-126     | 2.198917     | 0.454769     | 0.001   | 0.017732 |
| hsa-let-7g      | 2.405634     | 0.415691     | 0.001   | 0.019065 |
| hsa-miR-211     | 44.39504     | 0.022525     | 0.001   | 0.086494 |
| hsa-let-7c      | 4.16432      | 0.240135     | 0.002   | 0.007177 |
| hsa-miR-548c-5p | 0.069165     | 14.45814     | 0.002   | 0.007653 |
| hsa-miR-139-3p  | 313.1079     | 0.003194     | 0.002   | 0.014824 |
| hsa-miR-30c     | 2.109663     | 0.474009     | 0.002   | 0.015463 |
| hsa-miR-26a     | 2.353042     | 0.424982     | 0.002   | 0.016045 |
| hsa-miR-335     | 2.273675     | 0.439817     | 0.002   | 0.018827 |
| hsa-miR-29a     | 2.186995     | 0.457248     | 0.002   | 0.04048  |
| hsa-miR-184     | 88.17474     | 0.011341     | 0.003   | 0.016045 |
| hsa-miR-183     | 2.797199     | 0.3575       | 0.003   | 0.023609 |
| hsa-miR-383     | 30.73477     | 0.032536     | 0.003   | 0.05104  |
| hsa-miR-125a-5p | 2.482968     | 0.402744     | 0.004   | 0.016175 |
| hsa-miR-455     | 0.325801     | 3.069354     | 0.004   | 0.017808 |
| hsa-miR-125b    | 1.990835     | 0.502302     | 0.004   | 0.021217 |
| hsa-let-7b      | 2.153847     | 0.464286     | 0.004   | 0.02871  |

|                              |          |          |        |          |
|------------------------------|----------|----------|--------|----------|
| <b>mmu-miR-491</b>           | 1.731597 | 0.577502 | 0.004  | 0.034014 |
| <b>hsa-miR-186</b>           | 1.936481 | 0.516401 | 0.004  | 0.037334 |
| <b>hsa-miR-224</b>           | 0.349602 | 2.860394 | 0.004  | 0.03969  |
| <b>hsa-miR-204</b>           | 34.29999 | 0.029155 | 0.004  | 0.040969 |
| <b>hsa-miR-423-5p</b>        | 2.23569  | 0.447289 | 0.004  | 0.054769 |
| <b>hsa-miR-510</b>           | 23.70807 | 0.04218  | 0.005  | 0.037334 |
| <b>hsa-miR-145</b>           | 2.20847  | 0.452802 | 0.006  | 0.027343 |
| <b>hsa-miR-21</b>            | 0.535989 | 1.865711 | 0.006  | 0.034014 |
| <b>hsa-miR-506</b>           | 28.81457 | 0.034705 | 0.006  | 0.047251 |
| <b>hsa-let-7d</b>            | 1.748937 | 0.571776 | 0.006  | 0.064436 |
| <b>hsa-miR-22</b>            | 0.002847 | 351.2929 | 0.008  | 0.008889 |
| <b>mmu-miR-140</b>           | 1.560827 | 0.640686 | 0.008  | 0.095803 |
| <b>hsa-miR-30b</b>           | 1.884525 | 0.530638 | 0.009  | 0.03043  |
| <b>hsa-miR-140-3p</b>        | 2.0204   | 0.494952 | 0.009  | 0.053991 |
| <b>hsa-let-7a</b>            | 2.526337 | 0.39583  | 0.009  | 0.15602  |
| <b>hsa-miR-708</b>           | 0.45226  | 2.211119 | 0.012  | 0.081142 |
| <b>hsa-miR-320</b>           | 2.033516 | 0.491759 | 0.015  | 0.03043  |
| <b>hsa-miR-193a-3p</b>       | 0.39286  | 2.545437 | 0.015  | 0.075105 |
| <b>hsa-miR-422a</b>          | 3.133185 | 0.319164 | 0.016  | 0.055552 |
| <b>hsa-let-7<sup>e</sup></b> | 1.915082 | 0.522171 | 0.016  | 0.13616  |
| <b>hsa-miR-214</b>           | 1.907501 | 0.524246 | 0.018  | 0.052541 |
| <b>hsa-miR-532-3p</b>        | 1.772962 | 0.564028 | 0.018  | 0.064469 |
| <b>hsa-miR-101</b>           | 2.176836 | 0.459382 | 0.0185 | 0.053991 |
| <b>hsa-miR-130b</b>          | 0.476517 | 2.09856  | 0.02   | 0.064469 |
| <b>hsa-miR-579</b>           | 0.055099 | 18.14913 | 0.022  | 0.040969 |
| <b>hsa-miR-345</b>           | 1.778152 | 0.562382 | 0.022  | 0.06593  |
| <b>hsa-miR-548d-5p</b>       | 0.123125 | 8.121818 | 0.022  | 0.06593  |
| <b>hsa-miR-429</b>           | 1.933766 | 0.517126 | 0.022  | 0.137874 |
| <b>hsa-miR-185</b>           | 0.615875 | 1.623707 | 0.027  | 0.074389 |
| <b>hsa-miR-23b</b>           | 33.44478 | 0.0299   | 0.027  | 0.218984 |
| <b>hsa-miR-891a</b>          | 10.50865 | 0.09516  | 0.029  | 0.054769 |
| <b>hsa-miR-338-3p</b>        | 4.614451 | 0.216711 | 0.03   | 0.265803 |
| <b>hsa-miR-484</b>           | 1.471226 | 0.679705 | 0.033  | 0.125358 |
| <b>hsa-miR-138</b>           | 2.2001   | 0.454525 | 0.033  | 0.181722 |
| <b>hsa-miR-200a</b>          | 1.758164 | 0.568775 | 0.037  | 0.246984 |
| <b>hsa-miR-222</b>           | 2.157112 | 0.463583 | 0.04   | 0.13616  |
| <b>mmu-miR-187</b>           | 0.291636 | 3.42893  | 0.046  | 0.405157 |
| <b>hsa-miR-331-5p</b>        | 0.05677  | 17.6149  | 0.047  | 0.064469 |
| <b>hsa-miR-671-3p</b>        | 1.532939 | 0.652342 | 0.047  | 0.105328 |
| <b>hsa-miR-885-5p</b>        | 3.546121 | 0.281998 | 0.047  | 0.115283 |
| <b>hsa-miR-518d</b>          | 7.561453 | 0.13225  | 0.048  | 0.239144 |

**Table S2. Differentially expressed microRNAs between ocular sebaceous carcinoma (OSC) and corresponding healthy control tissue.** Listed are 78 miRNAs ( $p < 0.05$ ) that are differentially expressed between OSC ( $n=14$ ) and control tissue (Meibomian glands) ( $n=6$ ) and that were used in the supervised hierarchical clustering (Figure 1B).  $p$ -values of Mann Whitney U test and false discovery rate  $p$ -values (FDR) are listed as well as the average expression level ratios of control/OSC and OSC/control.

| miRNA           | Control/OSC | OSC/Control | P-value | FDR         |
|-----------------|-------------|-------------|---------|-------------|
| hsa-miR-139-5p  | 3.726178    | 0.268371    | 0.0001  | 0.000301465 |
| hsa-miR-199a-3p | 2.496246    | 0.400602    | 0.0001  | 0.000301465 |
| hsa-miR-328     | 2.918013    | 0.342699    | 0.0001  | 0.000301465 |
| hsa-miR-130b    | 0.401121    | 2.493013    | 0.0001  | 0.000301465 |
| hsa-miR-376c    | 3.114404    | 0.321089    | 0.0001  | 0.000301465 |
| hsa-miR-31      | 0.139595    | 7.163568    | 0.001   | 0.000301465 |
| hsa-miR-383     | 75.38322    | 0.013266    | 0.001   | 0.000301465 |
| hsa-miR-139-3p  | 106.1066    | 0.009424    | 0.001   | 0.000301465 |
| hsa-miR-15a     | 0.010381    | 96.32702    | 0.001   | 0.000301465 |
| hsa-miR-204     | 13.83021    | 0.072305    | 0.001   | 0.000301465 |
| hsa-miR-487b    | 3.040194    | 0.328926    | 0.001   | 0.000301465 |
| hsa-miR-125b    | 2.044631    | 0.489086    | 0.002   | 0.000301465 |
| hsa-miR-21      | 0.351752    | 2.842911    | 0.002   | 0.000301465 |
| hsa-miR-494     | 0.297415    | 3.362309    | 0.002   | 0.000301465 |
| hsa-miR-574-3p  | 2.222661    | 0.449911    | 0.002   | 0.000301465 |
| hsa-miR-193a-5p | 2.750874    | 0.363521    | 0.002   | 0.000301465 |
| hsa-miR-335     | 2.730895    | 0.36618     | 0.002   | 0.000301465 |
| hsa-miR-296     | 3.84469     | 0.260099    | 0.002   | 0.000301465 |
| hsa-miR-182     | 2.259389    | 0.442598    | 0.002   | 0.000301465 |
| hsa-miR-100     | 2.336035    | 0.428076    | 0.003   | 0.000301465 |
| hsa-miR-886-5p  | 0.318795    | 3.136816    | 0.003   | 0.000301465 |
| hsa-miR-338-3p  | 4.648259    | 0.215134    | 0.003   | 0.000301465 |
| hsa-miR-874     | 106.1133    | 0.009424    | 0.005   | 0.000301465 |
| hsa-miR-504     | 89.59001    | 0.011162    | 0.005   | 0.005102499 |
| hsa-miR-214     | 1.954108    | 0.511743    | 0.005   | 0.02594702  |
| hsa-miR-127     | 2.028345    | 0.493013    | 0.005   | 0.02594702  |
| mmu-miR-187     | 0.057611    | 17.35784    | 0.005   | 0.02594702  |
| hsa-miR-195     | 1.901813    | 0.525814    | 0.005   | 0.02594702  |
| hsa-miR-520b    | 0.075829    | 13.18763    | 0.006   | 0.02594702  |
| hsa-miR-125a-5p | 2.036363    | 0.491072    | 0.006   | 0.062187074 |
| hsa-miR-500     | 0.502096    | 1.991649    | 0.006   | 0.071335425 |
| hsa-miR-636     | 0.255577    | 3.912718    | 0.007   | 0.074872408 |
| hsa-miR-106b    | 0.350331    | 2.854446    | 0.009   | 0.074872408 |
| hsa-miR-655     | 4.508368    | 0.22181     | 0.009   | 0.074872408 |
| hsa-miR-422a    | 3.84747     | 0.259911    | 0.009   | 0.074872408 |
| hsa-miR-485-3p  | 4.506542    | 0.2219      | 0.009   | 0.074872408 |
| hsa-miR-503     | 0.128631    | 7.774191    | 0.01    | 0.074872408 |
| hsa-miR-212     | 0.499498    | 2.002009    | 0.012   | 0.074872408 |
| hsa-miR-329     | 5.324067    | 0.187826    | 0.012   | 0.100211609 |
| hsa-miR-660     | 0.534102    | 1.872301    | 0.012   | 0.100211609 |
| hsa-miR-155     | 0.285607    | 3.501309    | 0.012   | 0.100211609 |
| hsa-miR-135b    | 0.141648    | 7.059741    | 0.012   | 0.100211609 |
| hsa-miR-185     | 0.558834    | 1.789439    | 0.015   | 0.100211609 |
| hsa-miR-140-3p  | 2.73765     | 0.365277    | 0.015   | 0.100211609 |
| hsa-miR-542-3p  | 0.113813    | 8.786305    | 0.015   | 0.100211609 |
| hsa-miR-449     | 0.114493    | 8.734165    | 0.015   | 0.100211609 |
| hsa-miR-148a    | 1.602759    | 0.623924    | 0.015   | 0.100211609 |
| hsa-miR-196b    | 0.058826    | 16.99936    | 0.02    | 0.100211609 |

|                        |          |          |       |             |
|------------------------|----------|----------|-------|-------------|
| <b>hsa-miR-126</b>     | 1.850234 | 0.540472 | 0.02  | 0.109573987 |
| <b>hsa-miR-483-5p</b>  | 0.516552 | 1.935915 | 0.02  | 0.109573987 |
| <b>hsa-miR-365</b>     | 2.564304 | 0.389969 | 0.02  | 0.109573987 |
| <b>hsa-miR-193b</b>    | 2.117824 | 0.472183 | 0.02  | 0.109573987 |
| <b>mmu-miR-495</b>     | 2.656914 | 0.376376 | 0.02  | 0.109573987 |
| <b>hsa-miR-133b</b>    | 16.64768 | 0.060068 | 0.022 | 0.109573987 |
| <b>hsa-miR-542-5p</b>  | 0.073944 | 13.52377 | 0.023 | 0.109573987 |
| <b>hsa-miR-9</b>       | 0.131343 | 7.613652 | 0.026 | 0.143452639 |
| <b>hsa-miR-28</b>      | 0.575362 | 1.738035 | 0.026 | 0.145555496 |
| <b>hsa-miR-345</b>     | 0.467307 | 2.139922 | 0.026 | 0.145555496 |
| <b>hsa-miR-548c-5p</b> | 0.106316 | 9.405941 | 0.029 | 0.145555496 |
| <b>hsa-miR-331-5p</b>  | 0.045249 | 22.09972 | 0.03  | 0.153083206 |
| <b>hsa-let-7f</b>      | 3.506015 | 0.285224 | 0.032 | 0.163268208 |
| <b>hsa-miR-517a</b>    | 3.037029 | 0.329269 | 0.033 | 0.163268208 |
| <b>hsa-miR-99a</b>     | 1.978096 | 0.505537 | 0.033 | 0.163268208 |
| <b>hsa-miR-133a</b>    | 7.441203 | 0.134387 | 0.033 | 0.163268208 |
| <b>hsa-miR-744</b>     | 0.595053 | 1.680523 | 0.033 | 0.163268208 |
| <b>hsa-miR-218</b>     | 1.544023 | 0.647659 | 0.033 | 0.163268208 |
| <b>hsa-miR-517c</b>    | 2.756074 | 0.362835 | 0.033 | 0.163268208 |
| <b>hsa-miR-145</b>     | 1.65455  | 0.604394 | 0.033 | 0.163268208 |
| <b>hsa-miR-135a</b>    | 0.318652 | 3.138217 | 0.034 | 0.163268208 |
| <b>mmu-miR-451</b>     | 0.348596 | 2.868649 | 0.036 | 0.163268208 |
| <b>mmu-miR-93</b>      | 0.436937 | 2.288659 | 0.036 | 0.163268208 |
| <b>hsa-miR-23b</b>     | 41.3399  | 0.02419  | 0.037 | 0.163268208 |
| <b>hsa-miR-99b</b>     | 1.489505 | 0.671364 | 0.041 | 0.163268208 |
| <b>hsa-miR-512-3p</b>  | 2.623971 | 0.381102 | 0.041 | 0.163268208 |
| <b>hsa-miR-411</b>     | 1.494263 | 0.669226 | 0.044 | 0.163268208 |
| <b>hsa-miR-525-3p</b>  | 10.71605 | 0.093318 | 0.046 | 0.163268208 |
| <b>hsa-miR-548d-5p</b> | 0.169179 | 5.910906 | 0.046 | 0.183454131 |
| <b>hsa-let-7c</b>      | 1.861897 | 0.537087 | 0.046 | 0.183454131 |

**Table S3. Differentially expressed microRNAs between primary squamous cell carcinoma of the conjunctiva that metastasize (SCCC<sub>m</sub>) and those that do not (SCCC-).** Listed are 16 miRNAs (p<0.05) that are differentially expressed between primary SCCC (n=18) that eventually display metastases (SCCC<sub>m</sub>) and those that did not metastasize in the time-frame of the follow-up (SCCC-) and that were used in the supervised hierarchical clustering (Figure 2A). p-values of Mann Whitney U test and false discovery rate p-values (FDR) are listed as well as the average expression level ratios of SCCC-/SCCC<sub>m</sub> and SCCC<sub>m</sub>/SCCC-

| miRNA          | SCCC-/SCCC <sub>m</sub> | SCCC <sub>m</sub> /SCCC- | P- value | FDR    |
|----------------|-------------------------|--------------------------|----------|--------|
| hsa-miR-409-5p | 0.087115                | 11.47902                 | 0.002    | 0.468  |
| hsa-miR-590-5p | 1.879544                | 0.532044                 | 0.004    | 0.468  |
| hsa-miR-198    | 0.375235                | 2.664998                 | 0.007    | 0.468  |
| hsa-miR-32     | 5.346134                | 0.187051                 | 0.007    | 0.5482 |
| hsa-miR-143    | 0.612528                | 1.632578                 | 0.008    | 0.5482 |
| hsa-miR-629    | 0.129307                | 7.733511                 | 0.008    | 0.5482 |
| hsa-miR-548c   | 0.102292                | 9.775917                 | 0.015    | 0.468  |
| hsa-miR-99b    | 0.61549                 | 1.624722                 | 0.015    | 0.5157 |
| hsa-miR-125b   | 0.60897                 | 1.642116                 | 0.027    | 0.5482 |
| hsa-miR-199a   | 0.179127                | 5.582624                 | 0.029    | 0.669  |
| hsa-miR-505    | 0.104684                | 9.552585                 | 0.031    | 0.669  |
| hsa-miR-362    | 0.636025                | 1.572266                 | 0.035    | 0.5482 |
| hsa-miR-345    | 0.648909                | 1.541048                 | 0.044    | 0.669  |
| hsa-miR-34a    | 0.667004                | 1.499241                 | 0.044    | 0.669  |
| hsa-miR-335    | 1.617858                | 0.618101                 | 0.048    | 0.669  |

**Table S4. Differentially expressed microRNAs between ocular sebaceous carcinoma that recur (OSC<sub>R</sub>) and those that do not recur (OSC-).** Listed are 8 miRNAs (p<0.05) that are differentially expressed between primary OSC (n=14) that eventually recur (OSC<sub>R</sub>) and those that did not recur in the time-frame of the follow-up (OSC-) and that were used in the supervised hierarchical clustering (Figure 2B). p-values of Mann Whitney U test and false discovery rate p-values (FDR) are listed as well as the average expression level ratios of OSC-/OSC<sub>R</sub> and OSC<sub>R</sub>/OSC-.

| miRNA            | OSC-/OSC <sub>R</sub> | OSC <sub>R</sub> /OSC- | P-value | FDR      |
|------------------|-----------------------|------------------------|---------|----------|
| hsa-miR-525-3p   | 7,556668              | 0,132333               | 0,022   | 0,901513 |
| hsa-miR-219-1-3p | 21,36382              | 0,046808               | 0,032   | 0,901513 |
| hsa-miR-517b     | 5,566092              | 0,179659               | 0,043   | 0,901513 |
| hsa-miR-888      | 6,980908              | 0,143248               | 0,043   | 0,901513 |
| hsa-miR-506      | 12,20891              | 0,081907               | 0,043   | 0,901513 |
| hsa-miR-508      | 13,01921              | 0,07681                | 0,043   | 0,901513 |
| hsa-miR-411      | 0,551286              | 1,81394                | 0,043   | 0,901513 |
| hsa-miR-487b     | 0,336554              | 2,971289               | 0,043   | 0,901513 |

**Table S5. Differentially expressed microRNAs between squamous cell carcinoma of the conjunctiva (SCCC) and ocular sebaceous carcinoma (OSC).** Listed are 38 miRNAs ( $p < 0.05$ ) that are differentially expressed between SCCC ( $n=18$ ) and OSC ( $n=14$ ) and that were used in the supervised hierarchical clustering (Figure 3).  $p$ -values of Mann Whitney U test and false discovery rate  $p$ -values (FDR) are listed as well as the average expression level ratios of control/SCCC and SCCC/control.

| miRNA          | OSC/SCCC | SCCC/OSC | P-value | FDR         |
|----------------|----------|----------|---------|-------------|
| hsa-miR-152    | 0.549082 | 1.821222 | 0.0001  | 0.05408456  |
| hsa-miR-885-5p | 6.304642 | 0.158613 | 0.001   | 0.05408456  |
| hsa-miR-191    | 2.647099 | 0.377772 | 0.001   | 0.055200656 |
| hsa-miR-223    | 0.357044 | 2.800774 | 0.001   | 0.055200656 |
| mmu-miR-124a   | 0.1435   | 6.968617 | 0.001   | 0.153161901 |
| hsa-miR-455    | 0.333646 | 2.997191 | 0.002   | 0.055200656 |
| hsa-miR-183    | 3.464555 | 0.288637 | 0.002   | 0.056371921 |
| hsa-miR-107    | 17.86865 | 0.055964 | 0.002   | 0.101364558 |
| hsa-miR-375    | 4.561179 | 0.219242 | 0.004   | 0.100487348 |
| hsa-miR-9      | 7.334788 | 0.136337 | 0.005   | 0.071816105 |
| hsa-miR-455-3p | 0.411753 | 2.428641 | 0.005   | 0.153161901 |
| hsa-miR-425-5p | 2.421695 | 0.412934 | 0.007   | 0.133361292 |
| hsa-miR-196b   | 0.152276 | 6.567035 | 0.007   | 0.135762401 |
| hsa-miR-493-3p | 0.314701 | 3.177615 | 0.009   | 0.357218414 |
| hsa-miR-494    | 0.448891 | 2.227713 | 0.014   | 0.135762401 |
| hsa-miR-138    | 0.463725 | 2.156453 | 0.014   | 0.294185387 |
| hsa-miR-21     | 0.599696 | 1.667511 | 0.016   | 0.144977075 |
| hsa-miR-30c    | 1.847739 | 0.541202 | 0.017   | 0.176456266 |
| hsa-miR-101    | 2.070469 | 0.482982 | 0.018   | 0.118185238 |
| hsa-miR-148b   | 2.851371 | 0.350708 | 0.02    | 0.231117144 |
| hsa-miR-182    | 2.034129 | 0.491611 | 0.02    | 0.283798459 |
| hsa-miR-99b    | 0.712166 | 1.404166 | 0.02    | 0.29024011  |
| hsa-miR-590-5p | 1.703094 | 0.587167 | 0.022   | 0.283798459 |
| hsa-miR-655    | 0.387705 | 2.579283 | 0.022   | 0.379726354 |
| hsa-miR-32     | 2.279261 | 0.438739 | 0.023   | 0.560289283 |
| hsa-miR-135b   | 0.241916 | 4.133674 | 0.024   | 0.29024011  |
| hsa-miR-642    | 0.510223 | 1.959926 | 0.025   | 0.439894732 |
| hsa-miR-449    | 3.217069 | 0.310842 | 0.026   | 0.446197609 |
| hsa-miR-532-3p | 1.386819 | 0.721075 | 0.027   | 0.357218414 |
| hsa-miR-509-5p | 7.775498 | 0.128609 | 0.031   | 0.357218414 |
| hsa-miR-490    | 0.089071 | 11.22701 | 0.033   | 0.105338384 |
| mmu-miR-491    | 1.478838 | 0.676206 | 0.034   | 0.276178304 |
| hsa-miR-376c   | 0.470283 | 2.126379 | 0.034   | 0.456599223 |
| hsa-miR-483-5p | 0.592341 | 1.688216 | 0.037   | 0.357218414 |
| hsa-miR-891a   | 4.350374 | 0.229865 | 0.041   | 0.357218414 |
| hsa-let-7g     | 1.605626 | 0.62281  | 0.047   | 0.379726354 |
| hsa-miR-127    | 0.626917 | 1.595108 | 0.049   | 0.343479638 |
| hsa-miR-454    | 0.723781 | 1.381634 | 0.049   | 0.535630419 |

**Figure S1**

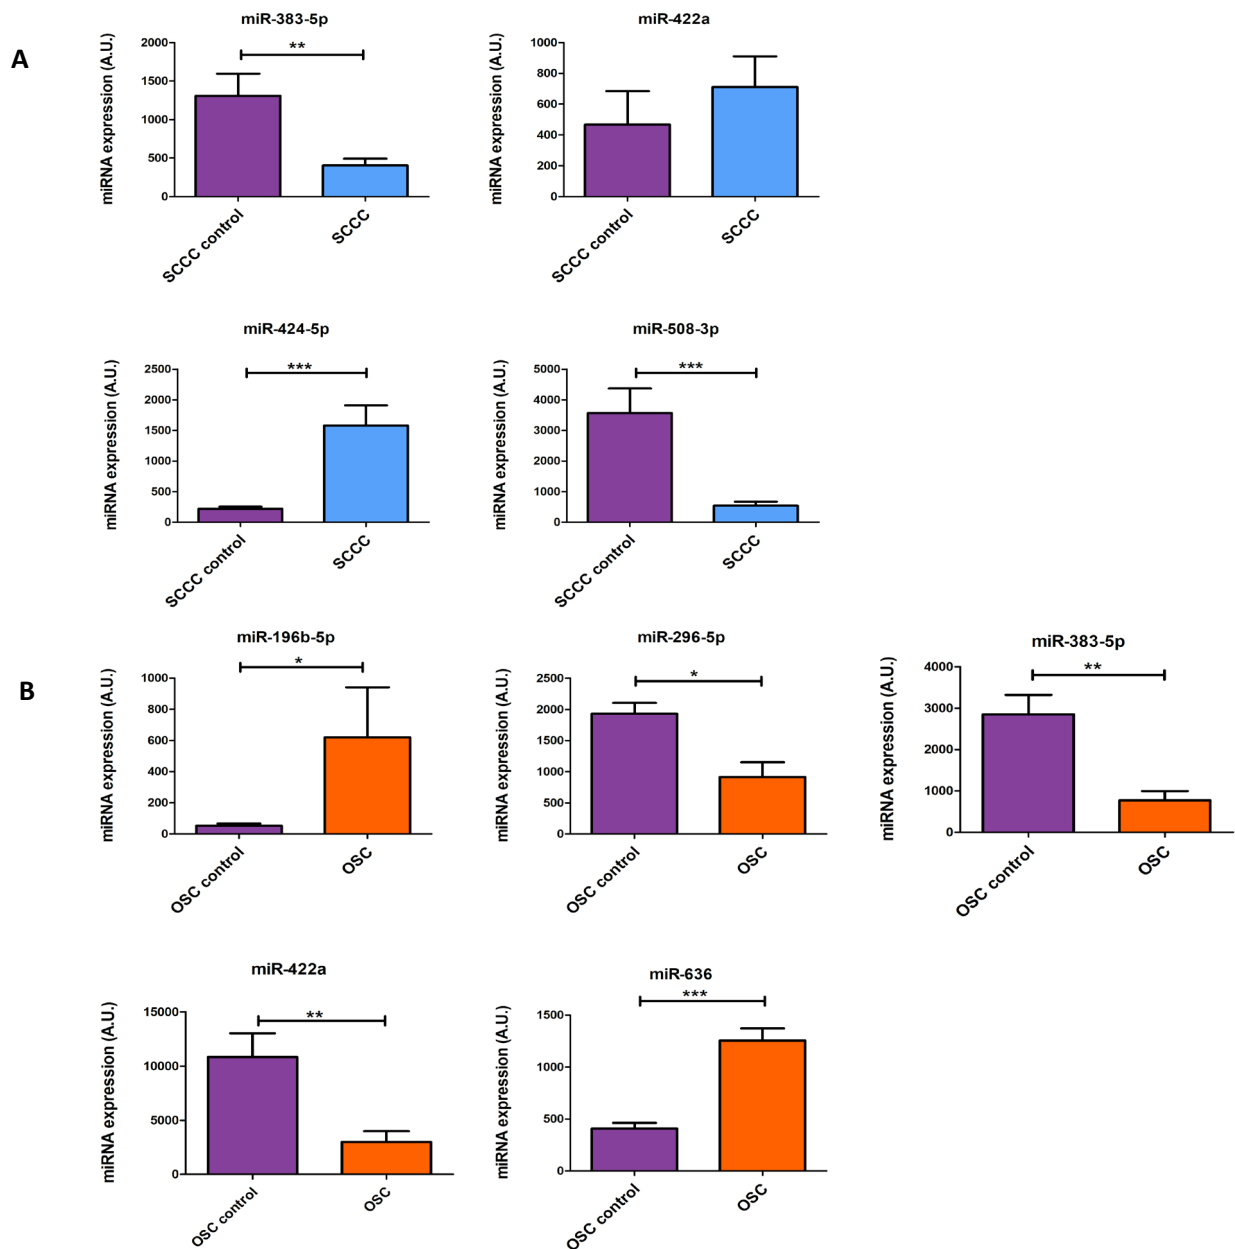

**Figure S1. Quantitative RT-PCR verification of selected differentially expressed microRNAs in squamous cell carcinoma of the conjunctiva (SCCC) and ocular sebaceous carcinoma (OSC) and their corresponding control tissues.** (A) A standardized RT-PCR procedure using individual assays was used to verify the expression of selected miRNAs found differentially expressed between SCCC and healthy control tissue (conjunctival squamous epithelium of the eyelid). The expression of miR-383-5p, miR-422a, miR-424-5p and miR-508-3p was determined in the original discovery cohort consisting of 18 SCCC and 6 control samples. (B) A standardized RT-PCR procedure using individual assays was used to verify the expression of selected miRNAs found differentially expressed between OSC and healthy control tissue (Meibomian glands). The expression of miR-196b-5p, miR-296-5p, miR-383-5p, miR-422a and miR-636 was determined in the original discovery cohort consisting of 14 OSC and 6 control samples. A standard dilution series of a cDNA samples-pool was used to determine absolute quantification of the miRNA expression. Depicted are average values  $\pm$  S.D. Asterisks indicate statistically significant differences \*  $p < 0.05$ ; \*\*  $p < 0.005$  and \*\*\*  $p < 0.0005$  (Mann Whitney U test)

**Figure S2**

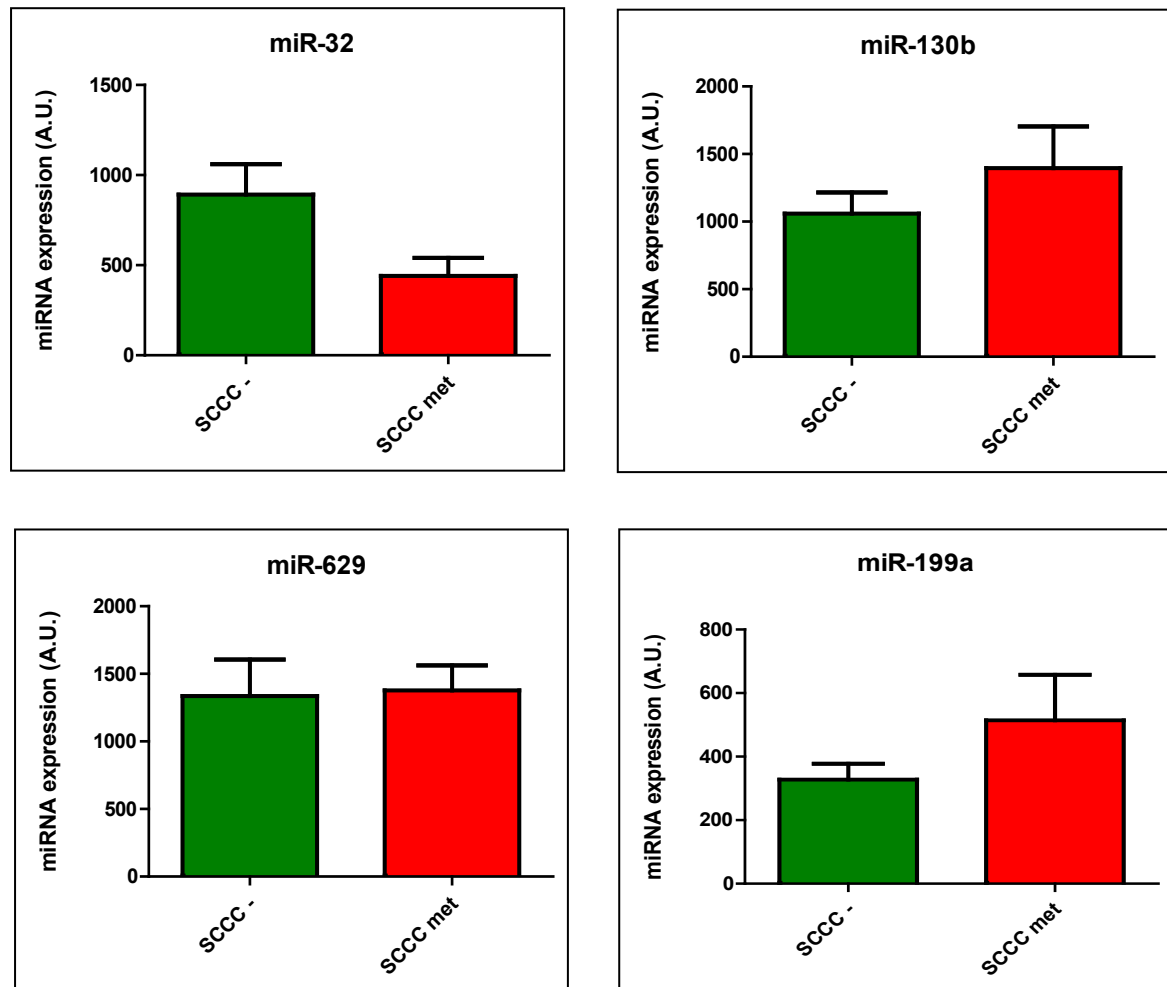

**Figure S2. Quantitative RT-PCR verification of selected differentially expressed microRNAs in squamous cell carcinoma of the conjunctiva that metastasize (SCCC<sub>met</sub>) and those that do not (SCCC<sub>-</sub>).** A standardized RT-PCR procedure using individual assays was used to verify the expression of selected miRNAs found differentially expressed between primary SCCC (n=18) that eventually display metastases (SCCC<sub>met</sub>) and those that did not metastasize in the time-frame of the follow-up (SCCC<sub>-</sub>) and that were used in the supervised hierarchical clustering (Figure 2A).



**Figure S3**

**A**

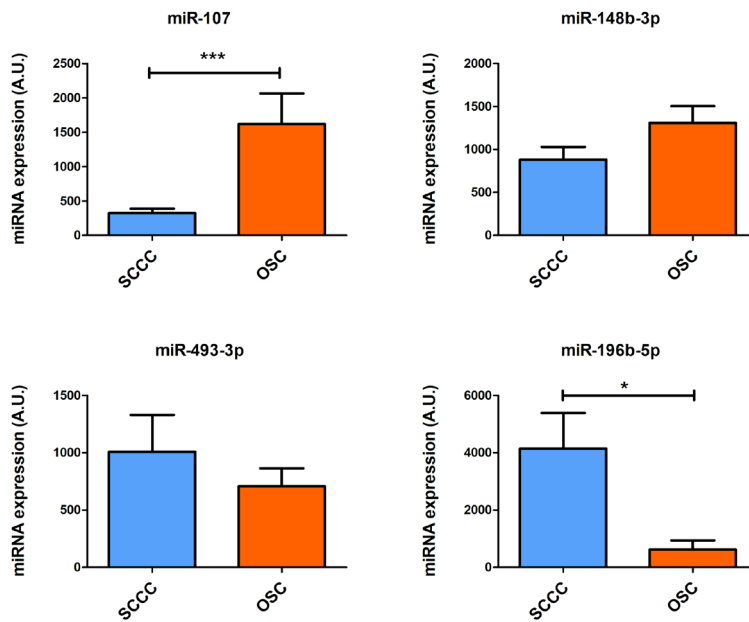

**B**

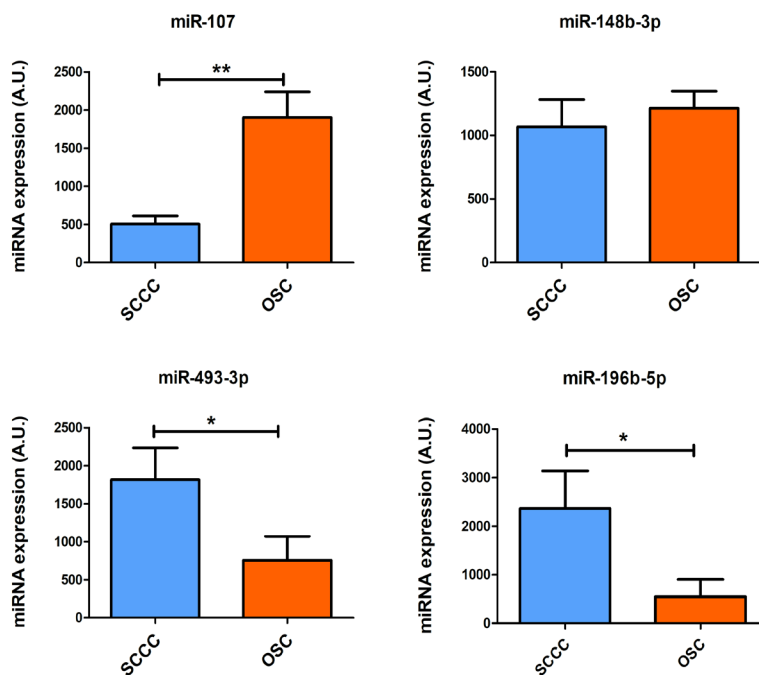

**Figure S3. Quantitative RT-PCR verification of selected differentially expressed microRNAs in squamous cell carcinoma of the conjunctiva (SCCC) and ocular sebaceous carcinoma (OSC).** A standardized RT-PCR procedure using individual assays was used to verify the expression of selected miRNAs found differentially expressed between SCCC and OSC (see Figure 3). The expression of miR-107, miR-148-3p, miR-196b-5p and miR-493-3p was determined in (A) the original discovery cohort consisting of 18 SCCC and 14 OSC samples and (B) an independent validation cohort consisting of 12 SCCC and 11 OSC samples. A standard dilution series of a cDNA samples-pool was used to determine absolute quantification of the miRNA expression. Depicted are average values  $\pm$  S.D. Asterisks indicate statistically significant differences \* p<0.05; \*\* p<0.005 and \*\*\* p<0.0005 (Mann Whitney U test).

**Figure S4**

| Sublist                  | Category     | Term                                                     | RT | Genes | Count | %   | P-Value | Benjamini |
|--------------------------|--------------|----------------------------------------------------------|----|-------|-------|-----|---------|-----------|
| <input type="checkbox"/> | KEGG_PATHWAY | MAPK signaling pathway                                   | RT |       | 53    | 3.0 | 2.2E-6  | 7.3E-4    |
| <input type="checkbox"/> | KEGG_PATHWAY | Proteoglycans in cancer                                  | RT |       | 37    | 2.1 | 9.6E-5  | 1.6E-2    |
| <input type="checkbox"/> | KEGG_PATHWAY | Endocytosis                                              | RT |       | 42    | 2.4 | 1.7E-4  | 1.7E-2    |
| <input type="checkbox"/> | KEGG_PATHWAY | Relaxin signaling pathway                                | RT |       | 26    | 1.5 | 2.3E-4  | 1.7E-2    |
| <input type="checkbox"/> | KEGG_PATHWAY | Ras signaling pathway                                    | RT |       | 39    | 2.2 | 2.8E-4  | 1.7E-2    |
| <input type="checkbox"/> | KEGG_PATHWAY | Oxytocin signaling pathway                               | RT |       | 29    | 1.6 | 3.1E-4  | 1.7E-2    |
| <input type="checkbox"/> | KEGG_PATHWAY | Colorectal cancer                                        | RT |       | 19    | 1.1 | 6.6E-4  | 3.1E-2    |
| <input type="checkbox"/> | KEGG_PATHWAY | Signaling pathways regulating pluripotency of stem cells | RT |       | 26    | 1.5 | 1.2E-3  | 3.5E-2    |
| <input type="checkbox"/> | KEGG_PATHWAY | Adipocytokine signaling pathway                          | RT |       | 16    | 0.9 | 1.2E-3  | 3.5E-2    |
| <input type="checkbox"/> | KEGG_PATHWAY | Chronic myeloid leukemia                                 | RT |       | 17    | 1.0 | 1.2E-3  | 3.5E-2    |
| <input type="checkbox"/> | KEGG_PATHWAY | Human cytomegalovirus infection                          | RT |       | 36    | 2.0 | 1.2E-3  | 3.5E-2    |
| <input type="checkbox"/> | KEGG_PATHWAY | Focal adhesion                                           | RT |       | 33    | 1.9 | 1.3E-3  | 3.5E-2    |
| <input type="checkbox"/> | KEGG_PATHWAY | Yersinia infection                                       | RT |       | 25    | 1.4 | 1.4E-3  | 3.5E-2    |
| <input type="checkbox"/> | KEGG_PATHWAY | Pathways in cancer                                       | RT |       | 69    | 3.9 | 2.5E-3  | 5.7E-2    |
| <input type="checkbox"/> | KEGG_PATHWAY | Rap1 signaling pathway                                   | RT |       | 33    | 1.9 | 2.8E-3  | 5.7E-2    |
| <input type="checkbox"/> | KEGG_PATHWAY | Prostate cancer                                          | RT |       | 19    | 1.1 | 2.8E-3  | 5.7E-2    |
| <input type="checkbox"/> | KEGG_PATHWAY | Kaposi sarcoma-associated herpesvirus infection          | RT |       | 31    | 1.8 | 3.0E-3  | 5.7E-2    |
| <input type="checkbox"/> | KEGG_PATHWAY | Viral carcinogenesis                                     | RT |       | 32    | 1.8 | 3.3E-3  | 5.8E-2    |
| <input type="checkbox"/> | KEGG_PATHWAY | FoxO signaling pathway                                   | RT |       | 23    | 1.3 | 3.7E-3  | 5.8E-2    |
| <input type="checkbox"/> | KEGG_PATHWAY | Prolactin signaling pathway                              | RT |       | 15    | 0.9 | 4.0E-3  | 5.8E-2    |
| <input type="checkbox"/> | KEGG_PATHWAY | ErbB signaling pathway                                   | RT |       | 17    | 1.0 | 4.1E-3  | 5.8E-2    |
| <input type="checkbox"/> | KEGG_PATHWAY | Dopaminergic synapse                                     | RT |       | 23    | 1.3 | 4.1E-3  | 5.8E-2    |
| <input type="checkbox"/> | KEGG_PATHWAY | Hedgehog signaling pathway                               | RT |       | 13    | 0.7 | 4.1E-3  | 5.8E-2    |
| <input type="checkbox"/> | KEGG_PATHWAY | Human papillomavirus infection                           | RT |       | 46    | 2.6 | 4.4E-3  | 5.8E-2    |
| <input type="checkbox"/> | KEGG_PATHWAY | Autophagy - animal                                       | RT |       | 24    | 1.4 | 4.5E-3  | 5.8E-2    |
| <input type="checkbox"/> | KEGG_PATHWAY | Melanoma                                                 | RT |       | 15    | 0.9 | 5.2E-3  | 6.4E-2    |
| <input type="checkbox"/> | KEGG_PATHWAY | Neurotrophin signaling pathway                           | RT |       | 21    | 1.2 | 5.5E-3  | 6.4E-2    |
| <input type="checkbox"/> | KEGG_PATHWAY | Growth hormone synthesis, secretion and action           | RT |       | 21    | 1.2 | 5.5E-3  | 6.4E-2    |
| <input type="checkbox"/> | KEGG_PATHWAY | Insulin signaling pathway                                | RT |       | 23    | 1.3 | 6.5E-3  | 7.3E-2    |
| <input type="checkbox"/> | KEGG_PATHWAY | Endocrine resistance                                     | RT |       | 18    | 1.0 | 7.3E-3  | 7.9E-2    |
| <input type="checkbox"/> | KEGG_PATHWAY | Glioma                                                   | RT |       | 15    | 0.9 | 7.5E-3  | 7.9E-2    |
| <input type="checkbox"/> | KEGG_PATHWAY | Adherens junction                                        | RT |       | 14    | 0.8 | 1.1E-2  | 1.2E-1    |
| <input type="checkbox"/> | KEGG_PATHWAY | Osteoclast differentiation                               | RT |       | 21    | 1.2 | 1.2E-2  | 1.2E-1    |
| <input type="checkbox"/> | KEGG_PATHWAY | AMPK signaling pathway                                   | RT |       | 20    | 1.1 | 1.3E-2  | 1.2E-1    |
| <input type="checkbox"/> | KEGG_PATHWAY | T cell receptor signaling pathway                        | RT |       | 18    | 1.0 | 1.3E-2  | 1.2E-1    |
| <input type="checkbox"/> | KEGG_PATHWAY | Estrogen signaling pathway                               | RT |       | 22    | 1.3 | 1.4E-2  | 1.3E-1    |
| <input type="checkbox"/> | KEGG_PATHWAY | Platelet activation                                      | RT |       | 20    | 1.1 | 1.8E-2  | 1.5E-1    |
| <input type="checkbox"/> | KEGG_PATHWAY | Wnt signaling pathway                                    | RT |       | 25    | 1.4 | 1.8E-2  | 1.5E-1    |
| <input type="checkbox"/> | KEGG_PATHWAY | Adrenergic signaling in cardiomyocytes                   | RT |       | 23    | 1.3 | 1.8E-2  | 1.5E-1    |
| <input type="checkbox"/> | KEGG_PATHWAY | Salmonella infection                                     | RT |       | 34    | 1.9 | 1.9E-2  | 1.6E-1    |
| <input type="checkbox"/> | KEGG_PATHWAY | Pancreatic cancer                                        | RT |       | 14    | 0.8 | 2.0E-2  | 1.6E-1    |
| <input type="checkbox"/> | KEGG_PATHWAY | Tight junction                                           | RT |       | 25    | 1.4 | 2.0E-2  | 1.6E-1    |
| <input type="checkbox"/> | KEGG_PATHWAY | Melanogenesis                                            | RT |       | 17    | 1.0 | 2.1E-2  | 1.6E-1    |
| <input type="checkbox"/> | KEGG_PATHWAY | PI3K-Akt signaling pathway                               | RT |       | 45    | 2.6 | 2.2E-2  | 1.7E-1    |
| <input type="checkbox"/> | KEGG_PATHWAY | Schizophrenia signaling pathway                          | RT |       | 19    | 1.1 | 2.3E-2  | 1.7E-1    |
| <input type="checkbox"/> | KEGG_PATHWAY | TGF-beta signaling pathway                               | RT |       | 16    | 0.9 | 2.3E-2  | 1.7E-1    |
| <input type="checkbox"/> | KEGG_PATHWAY | Longevity regulating pathway - multiple species          | RT |       | 12    | 0.7 | 2.4E-2  | 1.7E-1    |
| <input type="checkbox"/> | KEGG_PATHWAY | Toxoplasmosis                                            | RT |       | 18    | 1.0 | 2.6E-2  | 1.7E-1    |
| <input type="checkbox"/> | KEGG_PATHWAY | EGFR tyrosine kinase inhibitor resistance                | RT |       | 14    | 0.8 | 2.7E-2  | 1.7E-1    |
| <input type="checkbox"/> | KEGG_PATHWAY | Breast cancer                                            | RT |       | 22    | 1.3 | 2.7E-2  | 1.7E-1    |

**Figure S4. KEGG pathway analysis using predicted gene targets of deregulated microRNAs in OSC.** The predicted gene targets of miR-196b-5p, miR-296-5p, miR-383-5p, miR-422a and miR-636, all deregulated in OSC versus healthy control tissue, were downloaded from TargetScan (release 8.0; <https://www.targetscan.org>). The genes were subsequently used as input for the database for annotation, visualization and integrated discovery (DAVID- 2021 update; <https://david.ncifcrf.gov>) for a KEGG pathways analysis. Listed are the top 50 most significant pathways.

**Figure S5**

| Sublist                  | Category     | Term                                                     | RT | Genes | Count | %   | P-Value | Benjamini |
|--------------------------|--------------|----------------------------------------------------------|----|-------|-------|-----|---------|-----------|
| <input type="checkbox"/> | KEGG_PATHWAY | Breast cancer                                            | RT |       | 36    | 1.8 | 5.0E-7  | 7.4E-5    |
| <input type="checkbox"/> | KEGG_PATHWAY | Signaling pathways regulating pluripotency of stem cells | RT |       | 35    | 1.8 | 7.6E-7  | 7.4E-5    |
| <input type="checkbox"/> | KEGG_PATHWAY | Pathways in cancer                                       | RT |       | 88    | 4.5 | 7.9E-7  | 7.4E-5    |
| <input type="checkbox"/> | KEGG_PATHWAY | Neurotrophin signaling pathway                           | RT |       | 31    | 1.6 | 9.1E-7  | 7.4E-5    |
| <input type="checkbox"/> | KEGG_PATHWAY | Prolactin signaling pathway                              | RT |       | 21    | 1.1 | 8.0E-6  | 5.2E-4    |
| <input type="checkbox"/> | KEGG_PATHWAY | Gastric cancer                                           | RT |       | 33    | 1.7 | 1.6E-5  | 7.6E-4    |
| <input type="checkbox"/> | KEGG_PATHWAY | Proteoglycans in cancer                                  | RT |       | 41    | 2.1 | 1.7E-5  | 7.6E-4    |
| <input type="checkbox"/> | KEGG_PATHWAY | Hippo signaling pathway                                  | RT |       | 34    | 1.7 | 1.9E-5  | 7.6E-4    |
| <input type="checkbox"/> | KEGG_PATHWAY | MAPK signaling pathway                                   | RT |       | 52    | 2.7 | 3.7E-5  | 1.3E-3    |
| <input type="checkbox"/> | KEGG_PATHWAY | mTOR signaling pathway                                   | RT |       | 33    | 1.7 | 4.2E-5  | 1.3E-3    |
| <input type="checkbox"/> | KEGG_PATHWAY | Insulin signaling pathway                                | RT |       | 30    | 1.5 | 5.2E-5  | 1.5E-3    |
| <input type="checkbox"/> | KEGG_PATHWAY | Measles                                                  | RT |       | 30    | 1.5 | 6.8E-5  | 1.8E-3    |
| <input type="checkbox"/> | KEGG_PATHWAY | Chronic myeloid leukemia                                 | RT |       | 20    | 1.0 | 1.0E-4  | 2.5E-3    |
| <input type="checkbox"/> | KEGG_PATHWAY | Human papillomavirus infection                           | RT |       | 55    | 2.8 | 1.2E-4  | 2.8E-3    |
| <input type="checkbox"/> | KEGG_PATHWAY | Renal cell carcinoma                                     | RT |       | 18    | 0.9 | 2.8E-4  | 6.1E-3    |
| <input type="checkbox"/> | KEGG_PATHWAY | Pancreatic cancer                                        | RT |       | 19    | 1.0 | 3.2E-4  | 6.5E-3    |
| <input type="checkbox"/> | KEGG_PATHWAY | Wnt signaling pathway                                    | RT |       | 32    | 1.6 | 3.7E-4  | 6.8E-3    |
| <input type="checkbox"/> | KEGG_PATHWAY | PI3K-Akt signaling pathway                               | RT |       | 56    | 2.9 | 3.8E-4  | 6.8E-3    |
| <input type="checkbox"/> | KEGG_PATHWAY | Hepatitis B                                              | RT |       | 31    | 1.6 | 4.7E-4  | 8.1E-3    |
| <input type="checkbox"/> | KEGG_PATHWAY | p53 signaling pathway                                    | RT |       | 18    | 0.9 | 5.7E-4  | 9.3E-3    |
| <input type="checkbox"/> | KEGG_PATHWAY | Acute myeloid leukemia                                   | RT |       | 17    | 0.9 | 6.2E-4  | 9.5E-3    |
| <input type="checkbox"/> | KEGG_PATHWAY | Cellular senescence                                      | RT |       | 29    | 1.5 | 1.2E-3  | 1.7E-2    |
| <input type="checkbox"/> | KEGG_PATHWAY | AMPK signaling pathway                                   | RT |       | 24    | 1.2 | 1.3E-3  | 1.7E-2    |
| <input type="checkbox"/> | KEGG_PATHWAY | Hepatitis C                                              | RT |       | 29    | 1.5 | 1.3E-3  | 1.7E-2    |
| <input type="checkbox"/> | KEGG_PATHWAY | Small cell lung cancer                                   | RT |       | 20    | 1.0 | 1.3E-3  | 1.7E-2    |
| <input type="checkbox"/> | KEGG_PATHWAY | Melanoma                                                 | RT |       | 17    | 0.9 | 1.4E-3  | 1.8E-2    |
| <input type="checkbox"/> | KEGG_PATHWAY | Colorectal cancer                                        | RT |       | 19    | 1.0 | 1.5E-3  | 1.8E-2    |
| <input type="checkbox"/> | KEGG_PATHWAY | Hepatocellular carcinoma                                 | RT |       | 30    | 1.5 | 1.8E-3  | 2.1E-2    |
| <input type="checkbox"/> | KEGG_PATHWAY | FoxO signaling pathway                                   | RT |       | 25    | 1.3 | 2.0E-3  | 2.2E-2    |
| <input type="checkbox"/> | KEGG_PATHWAY | Salmonella infection                                     | RT |       | 40    | 2.0 | 2.2E-3  | 2.4E-2    |
| <input type="checkbox"/> | KEGG_PATHWAY | Prostate cancer                                          | RT |       | 20    | 1.0 | 2.6E-3  | 2.7E-2    |
| <input type="checkbox"/> | KEGG_PATHWAY | Sphingolipid signaling pathway                           | RT |       | 23    | 1.2 | 2.6E-3  | 2.7E-2    |
| <input type="checkbox"/> | KEGG_PATHWAY | Central carbon metabolism in cancer                      | RT |       | 16    | 0.8 | 2.9E-3  | 2.8E-2    |
| <input type="checkbox"/> | KEGG_PATHWAY | Axon guidance                                            | RT |       | 31    | 1.6 | 3.2E-3  | 3.1E-2    |
| <input type="checkbox"/> | KEGG_PATHWAY | Non-small cell lung cancer                               | RT |       | 16    | 0.8 | 3.8E-3  | 3.5E-2    |
| <input type="checkbox"/> | KEGG_PATHWAY | Focal adhesion                                           | RT |       | 33    | 1.7 | 4.2E-3  | 3.7E-2    |
| <input type="checkbox"/> | KEGG_PATHWAY | HIF-1 signaling pathway                                  | RT |       | 21    | 1.1 | 4.4E-3  | 3.8E-2    |
| <input type="checkbox"/> | KEGG_PATHWAY | Rap1 signaling pathway                                   | RT |       | 34    | 1.7 | 4.5E-3  | 3.8E-2    |
| <input type="checkbox"/> | KEGG_PATHWAY | Autophagy - animal                                       | RT |       | 25    | 1.3 | 5.3E-3  | 4.4E-2    |
| <input type="checkbox"/> | KEGG_PATHWAY | Apoptosis                                                | RT |       | 24    | 1.2 | 6.7E-3  | 5.5E-2    |
| <input type="checkbox"/> | KEGG_PATHWAY | Yersinia infection                                       | RT |       | 24    | 1.2 | 7.4E-3  | 5.7E-2    |
| <input type="checkbox"/> | KEGG_PATHWAY | Basal cell carcinoma                                     | RT |       | 14    | 0.7 | 7.4E-3  | 5.7E-2    |
| <input type="checkbox"/> | KEGG_PATHWAY | Regulation of actin cytoskeleton                         | RT |       | 34    | 1.7 | 7.9E-3  | 6.0E-2    |
| <input type="checkbox"/> | KEGG_PATHWAY | Endometrial cancer                                       | RT |       | 13    | 0.7 | 9.7E-3  | 7.1E-2    |
| <input type="checkbox"/> | KEGG_PATHWAY | Inositol phosphate metabolism                            | RT |       | 15    | 0.8 | 1.1E-2  | 7.8E-2    |
| <input type="checkbox"/> | KEGG_PATHWAY | Cell cycle                                               | RT |       | 22    | 1.1 | 1.1E-2  | 7.8E-2    |
| <input type="checkbox"/> | KEGG_PATHWAY | C-type lectin receptor signaling pathway                 | RT |       | 19    | 1.0 | 1.2E-2  | 8.0E-2    |
| <input type="checkbox"/> | KEGG_PATHWAY | T cell receptor signaling pathway                        | RT |       | 19    | 1.0 | 1.2E-2  | 8.0E-2    |
| <input type="checkbox"/> | KEGG_PATHWAY | Type II diabetes mellitus                                | RT |       | 11    | 0.6 | 1.2E-2  | 8.0E-2    |
| <input type="checkbox"/> | KEGG_PATHWAY | Longevity regulating pathway                             | RT |       | 17    | 0.9 | 1.2E-2  | 8.0E-2    |

**Figure S5. KEGG pathway analysis using predicted gene targets of deregulated microRNAs in SCCC.** The predicted gene targets of miR-383-5p, miR-424-5p and miR-508-3p, all deregulated in SCCC versus healthy control tissue, were downloaded from TargetScan (release 8.0; <https://www.targetscan.org>). The genes were subsequently used as input for the database for annotation, visualization and integrated discovery (DAVID- 2021 update; <https://david.ncifcrf.gov>) for a KEGG pathways analysis. Listed are the top 50 most significant pathways.
